# Supplementary material
Source: Royal Society of Chemistry journal article supplement (doi:10.1039/d6nj00845c)
Supplement: d6nj00845c1.pdf [file d6nj00845c1.pdf]

**Electronic Supplementary Material (ESI) for New Journal Of  
Chemistry.**

**Supporting Information**

Dual-Function Colorimetric Platform for Hg<sup>2+</sup> Detection and Cys/Hcy  
Discrimination Based on the Peroxidase-Like Activity of CuAu  
Nanozymes

Kunle Wang, Ya You, Yufei Liu,\* Wei Liu\*

a School of Pharmacy, Henan Medical University, Xinxiang 453003, P.  
R. China

\* Correspondence authors:

E-mail:liuwei@xxmu.edu.cn

liuyufei19841104@163.com

## Experiments

### Chemicals

Sodium citrate ( $C_6H_5Na_3O_7$ ), Sodium acetate (NaAc), Hydrogen peroxide ( $H_2O_2$ , 30.0%, w/w) was supplied by Aladdin Chemistry Company (Shanghai, China).  $NaBH_4$  was obtained from Tianjin Comio Chemical Reagent Co., Ltd. (Tianjin, China). Chloroauric acid tetrahydrate ( $HAuCl_4 \cdot 4H_2O$ ), L-Cys, Hcy,  $CuSO_4$ ,  $CuCl_2$ ,  $FeCl_2$ ,  $MgCl_2$ ,  $CaCO_3$ , other amino acids and other chemicals were purchased from Rhawn Reagent (Shanghai, China).  $Hg(NO_3)_2$  was bought from Cyrus Chemical Reagent Co., Ltd. (Foshan, China). Acetic acid was gotten from Tianjin Damao Chemical Reagent Co., Ltd. (Tianjing, China).  $AgNO_3$  was purchased from Dongjulong Chemical Technology Co., Ltd. (Tianjin, China). Vitamin C was obtained from Aladdin Chemistry Company (Shanghai, China). Vitamin C, 3, 3', 5, 5'-tetramethylbenzidine (TMB) were purchased from Shanghai Macklin Biochemical Technology Co., Ltd. (Shanghai, China). The water used throughout the study was deionized water ( $18.2 M\Omega cm^{-1}$ ). All chemicals used were analytical reagents.

### Apparatus

Ultraviolet-visible (UV-vis) absorption spectra were recorded using a Shimadzu UV-2700 spectrophotometer (Japan). Zeta potential measurements were carried out with a Zetasizer laser particle analyzer (Zetasizer Nano ZS 90, Malvern, UK). Transmission electron microscopy (TEM) images were obtained using a transmission electron microscope (JEM-F200, Japan electron optics laboratory, Japan) at a voltage of 200 kV. X-ray diffraction (XRD) measurements were performed using a Rigaku SmartLab SE X-ray diffractometer (Japan).

### Detection of $Hg^{2+}$

First,  $30 \mu L$   $Hg^{2+}$  (10-100  $\mu M$ ) is mixed with  $150 \mu L$  of CuAuNPs. Subsequently, Then, the mixture was added to  $2694 \mu L$  of NaAc-HAc buffer,  $90 \mu L$  of  $H_2O_2$  solution, and  $36 \mu L$  of TMB mixed solution. After thorough mixing, the reaction is incubated for 20 min at room temperature. Finally, the absorbance is measured at 652 nm using a UV spectrophotometer.

## Detection of Cys/Hcy

First, 30  $\mu\text{L}$  Cys (0.5-4 mM) or Hcy (0.6-5 mM) solution and 2.7  $\mu\text{L}$   $\text{Hg}^{2+}$  solution (1 mM) are sequentially mixed with 150  $\mu\text{L}$  of CuAuNPs. Then, the mixture was added to 2692  $\mu\text{L}$  of NaAc-HAc buffer, 90  $\mu\text{L}$  of  $\text{H}_2\text{O}_2$  solution, and 36  $\mu\text{L}$  of TMB mixed solution. After thorough mixing, the reaction is incubated for 20 min at room temperature. Finally, the absorbance is measured at 652 nm using a UV spectrophotometer.

## Detection of $\text{Hg}^{2+}$ in emollient water

Three batches of emollient water were analyzed. First, sequentially mix 30  $\mu\text{L}$  of the test emollient water with 30  $\mu\text{L}$   $\text{Hg}^{2+}$  (10-100  $\mu\text{M}$ ) and 150  $\mu\text{L}$  of CuAuNPs. Then, the mixture was added to 2664  $\mu\text{L}$  of NaAc-HAc buffer, 90  $\mu\text{L}$  of  $\text{H}_2\text{O}_2$  solution, and 36  $\mu\text{L}$  of TMB mixed solution. After mixing, let it stand for 20 minutes, and finally, measure the absorbance at 652 nm using a UV spectrophotometer.

## Detection of Cys/ Hcy in Rat Serum

Specifically, serum samples were mixed with acetonitrile at a volume ratio of 1:3 to precipitate proteins. The supernatant was then collected and subjected to solid-phase extraction (SPE) using GST agarose purification resin (product No. C600327, purchased from Shanghai Sangon Biotech Co., Ltd.) to remove GSH, and the flow-through fraction was collected. After SPE, the GSH removal efficiency was assessed using a reduced glutathione content assay kit (product No. D799613, Sangon Biotech). No GSH was detected following SPE, indicating that its interference was effectively eliminated. Meanwhile, a cysteine content assay kit (product No. D799571, Sangon Biotech) was used to examine the retention of Cys, and the results confirmed that the recovery rate of cysteine during the SPE process ranged from 98.2% to 105.0%. The detection of Hcy was not performed due to the lack of a dedicated Hcy assay reagent. The separated serum sample was stored for subsequent analysis. Following the addition of varying concentrations of Cys/Hcy standards, the mixtures were centrifuged at 10,000 rpm for 10 minutes. Then sequentially mix 30  $\mu\text{L}$  sample, 2.7  $\mu\text{L}$   $\text{Hg}^{2+}$  (1 mM), 30  $\mu\text{L}$  Cys (0.5-4 mM) or Hcy (0.6-5 mM) solution with 150  $\mu\text{L}$  of CuAuNPs. Then, the mixture was added to 2662  $\mu\text{L}$  of NaAc-HAc buffer, 90  $\mu\text{L}$  of  $\text{H}_2\text{O}_2$  solution, and 36  $\mu\text{L}$  of TMB mixed solution. After mixing, let it stand for 20 minutes, and finally, measure the absorbance at 652 nm using a UV spectrophotometer.



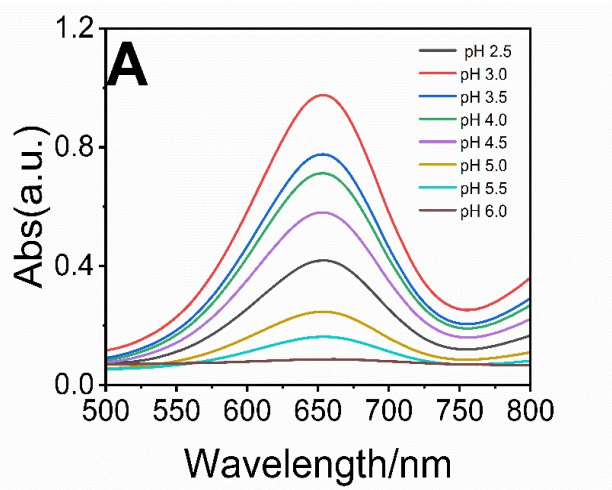





**Table S1** Comparison of linear ranges and LODs for the detection of Hg<sup>2+</sup>, Cys, and Hcy with previously reported nanozymes.

| Nanomaterials                                               | Test substance   | Linear range              | LOD      | Recoveries (%)    | RSD(%) | Ref.             |
|-------------------------------------------------------------|------------------|---------------------------|----------|-------------------|--------|------------------|
| GTP                                                         |                  | 50-10000 nM               | 38 nM    | 100.6-114.7       | <9.6   | 1                |
| Fe <sub>3</sub> S <sub>4</sub>                              |                  | 50-2000 nM                | 26 nM    | 90-110            | <5.0   | 2                |
| AgNPs-CMs                                                   | Hg <sup>2+</sup> | 2-833 nM<br>2500-40000 nM | 1.1 nM   | 95.65-106.56      | <7.84  | 3                |
| CeO <sub>2</sub> -MIL (Fe)                                  |                  | 0-6 nM                    | 2 nM     | 98.7-101.2        | /      | 4                |
| CuAuNPs                                                     |                  | 100-900 nM                | 10 nM    | 90.4-110.2        | <6.7   | <b>This work</b> |
| GTP                                                         |                  | 0.1-20 μM                 | 0.094 μM | 90.4-98.3         | <2.7   | 1                |
| Fe-CDs                                                      |                  | 1-60 μM                   | 0.29 μM  | 90.7-98.62        | <3.3   | 5                |
| BSA-Cu <sub>3</sub> (PO <sub>4</sub> ) <sub>2</sub><br>HNFs | L-Cys            | 10-200 μM                 | 3.5 μM   | 93.3-103.6        | <6.99  | 6                |
| Ficin-CuNPs                                                 |                  | 0.5-30 μM                 | 0.1 μM   | 100.55-<br>105.34 | <1.12  | 7                |
| CuAuNPs                                                     |                  | 5-40 μM                   | 2.5 μM   | 99.4-108.1        | <6.2   | <b>This work</b> |
| Fe-CDs                                                      |                  | 1-60 μM                   | 1.41 μM  | 98.67-99.87       | <3.3   | 5                |
| BSA-Cu <sub>3</sub> (PO <sub>4</sub> ) <sub>2</sub><br>HNFs | Hcy              | 10-200 μM                 | 7.7 μM   | 91.9-107          | <6.33  | 6                |
| Ficin-CuNPs                                                 |                  | 0.5-30 μM                 | 0.3 μM   | 97.72-106.67      | <0.76  | 7                |
| CuAuNPs                                                     |                  | 6-50 μM                   | 2.5 μM   | 95.0-104.1        | <6.4   | <b>This work</b> |

**Table S2** Inter-day and intra day precision for the detection of Hg<sup>2+</sup>, Cys and Hcy

| <b>Samples</b>                | <b>Added</b> | <b>Inter-Day<br/>(RSD, %; n=5)</b> | <b>Intra-Day (RSD,<br/>%; n=5)</b> |
|-------------------------------|--------------|------------------------------------|------------------------------------|
| CuAuNPs-Hg <sup>2+</sup>      | 300 nM       | 5.3                                | 2.6                                |
|                               | 500 nM       | 7.7                                | 3.4                                |
|                               | 700 nM       | 10.8                               | 8.6                                |
| CuAuNPs-Hg <sup>2+</sup> -Cys | 15 μM        | 8.4                                | 8.6                                |
|                               | 25 μM        | 1.3                                | 1.1                                |
|                               | 35 μM        | 1.2                                | 0.5                                |
| CuAuNPs-Hg <sup>2+</sup> -Hcy | 15 μM        | 5.2                                | 1.3                                |
|                               | 30 μM        | 2.9                                | 0.8                                |
|                               | 45 μM        | 0.6                                | 0.9                                |

**Table S3** Detection of Hg<sup>2+</sup> in emollient water(n=3)

| <b>Samples</b> | <b>Added (μM)</b> | <b>Found (μM)</b> | <b>Recovery (%)</b> | <b>RSD(%)</b> |
|----------------|-------------------|-------------------|---------------------|---------------|
| 1              | 0.2               | 0.21              | 105.2               | 4.0           |
|                | 0.6               | 0.56              | 93.9                | 2.9           |
|                | 0.9               | 0.91              | 101.3               | 1.2           |
| 2              | 0.2               | 0.21              | 104.2               | 3.8           |
|                | 0.6               | 0.58              | 97.1                | 2.8           |
|                | 0.9               | 0.89              | 98.8                | 1.7           |
| 3              | 0.2               | 0.23              | 114.0               | 3.9           |
|                | 0.6               | 0.59              | 98.3                | 6.7           |
|                | 0.9               | 0.88              | 98.0                | 2.4           |

**Table S4** Detection of Cys in Rat Serum(n=3)

| <b>Samples</b> | <b>Added (μM)</b> | <b>Found (μM)</b> | <b>Recovery (%)</b> | <b>RSD(%)</b> |
|----------------|-------------------|-------------------|---------------------|---------------|
| 1              | 15                | 16.21             | 108.1               | 6.2           |
|                | 25                | 24.85             | 99.4                | 1.2           |
|                | 35                | 35.98             | 102.8               | 2.4           |
| 2              | 15                | 15.06             | 100.4               | 1.1           |
|                | 25                | 25.72             | 102.9               | 5.5           |
|                | 35                | 36.15             | 103.3               | 3.9           |
| 3              | 15                | 15.16             | 101.1               | 1.1           |
|                | 25                | 25.32             | 101.3               | 2.6           |
|                | 35                | 35.43             | 101.2               | 1.2           |

**Table S5** Detection of Hcy in Rat Serum(n=3)

| <b>Samples</b> | <b>Added (<math>\mu\text{M}</math>)</b> | <b>Found (<math>\mu\text{M}</math>)</b> | <b>Recovery (%)</b> | <b>RSD(%)</b> |
|----------------|-----------------------------------------|-----------------------------------------|---------------------|---------------|
| 1              | 15                                      | 15.31                                   | 102.1               | 1.9           |
|                | 30                                      | 28.50                                   | 95.0                | 4.3           |
|                | 45                                      | 47.08                                   | 104.6               | 2.0           |
| 2              | 15                                      | 15.88                                   | 105.9               | 6.4           |
|                | 30                                      | 29.91                                   | 99.7                | 2.3           |
|                | 45                                      | 45.80                                   | 101.8               | 2.6           |
| 3              | 15                                      | 14.92                                   | 99.4                | 0.2           |
|                | 30                                      | 31.23                                   | 104.1               | 2.3           |
|                | 45                                      | 46.07                                   | 102.4               | 3.1           |

## References

1. N. Huang, D. Yang, H. Chen, Y. Xiao, J. Wen, Y. Long and H. Zheng, *Spectrochimica Acta Part A: Molecular and Biomolecular Spectroscopy*, 2023, **290**.
2. J. Wu, L. Liang, S. Li, Y. Qin, S. Zhao and F. Ye, *Spectrochimica Acta Part A: Molecular and Biomolecular Spectroscopy*, 2024, **317**.
3. Z. Zhang, D. Liu, X. Zhang, X. Luo, W. Lin, Z. Li and J. Huang, *Microchimica Acta*, 2023, **190**.
4. A. Amalraj, M. Narayanan and P. Perumal, *The Analyst*, 2022, **147**, 3234-3247.
5. S. Xie, Q. Lei, L. Zeng and H. Xiong, *Spectrochimica Acta Part A: Molecular and Biomolecular Spectroscopy*, 2025, **327**.
6. H. Li, L. Cen, S. Liu, Z. Qiu, Y. Zhang and X. Luo, *Analytica Chimica Acta*, 2025, **1377**.
7. T. V. Dang, J. M. Kim and M. I. Kim, *Microchimica Acta*, 2023, **190**.
